# Supplementary material for: An efficient bifunctional catalyst of Fe/Fe3C carbon nanofibers for rechargeable Li–O2 batteries
Source: Royal Society of Chemistry journal article supplement (doi:10.1039/c4ta01831a), 2014-01-01
Supplement: c4ta01831a1.pdf [file c4ta01831a1.pdf]

## Electronic Supplementary Material (ESI) for

### An efficient bifunctional catalyst of Fe/Fe<sub>3</sub>C carbon nanofibers for rechargeable Li-O<sub>2</sub> Batteries

Jiixin Li,<sup>1,2,3</sup> Mingzhong Zou,<sup>2</sup> Luzhuo Chen,<sup>2</sup> Zhigao Huang,<sup>1,2\*</sup> Lunhui Guan<sup>1,3\*</sup>

<sup>1</sup>State Key Laboratory of Structural Chemistry, Fujian Institute of Research on the Structure of Matter, Chinese Academy of Sciences, Fuzhou, Fujian 350002, P.R. China

<sup>2</sup>College of Physics and Energy, Fujian Normal University, Fuzhou, 350007, China

<sup>3</sup>Key Laboratory of Design and Assembly of Functional Nanostructures, Chinese Academy of Sciences, Fuzhou, Fujian 350002, P.R. China

\*Telephone/Fax: 86-591-83792835. E-mail: [guanlh@fjirsm.ac.cn](mailto:guanlh@fjirsm.ac.cn), [zghuang@fjnu.edu.cn](mailto:zghuang@fjnu.edu.cn).

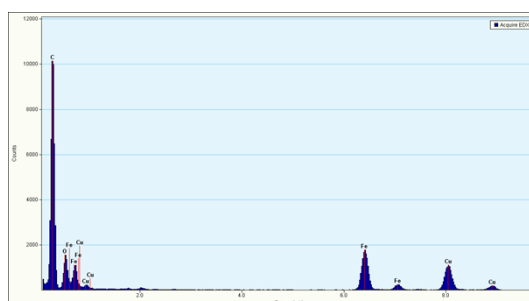

**Fig. S1.** EDS pattern of Fe/Fe<sub>3</sub>C-CNFs.

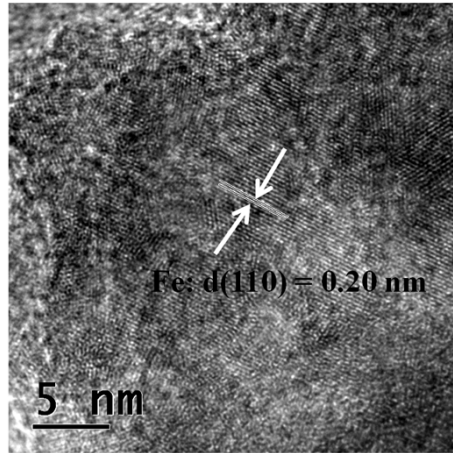

**Fig. S2.** HR-TEM image of Fe/Fe<sub>3</sub>C-CNFs.

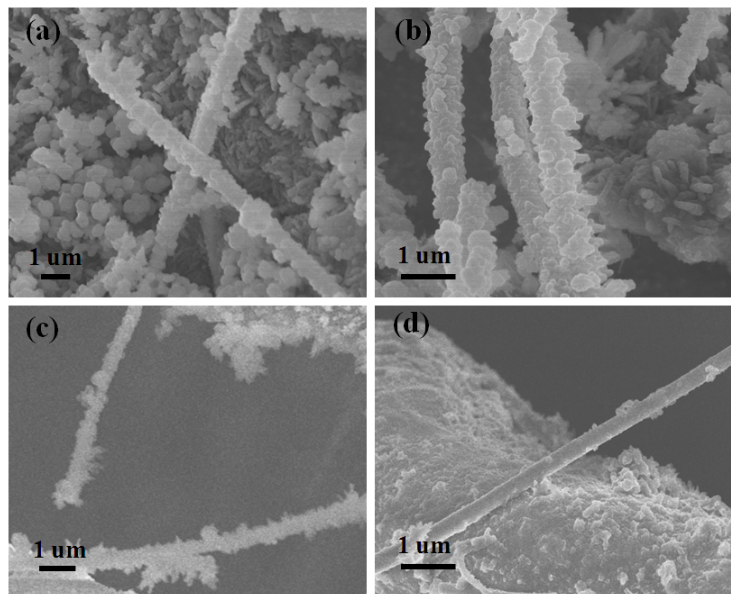

**Fig. S3.** SEM images of (a)~(c) Fe/Fe<sub>3</sub>C-CNF cathode after discharge and (d) Fe/Fe<sub>3</sub>C-CNF cathode after recharge.

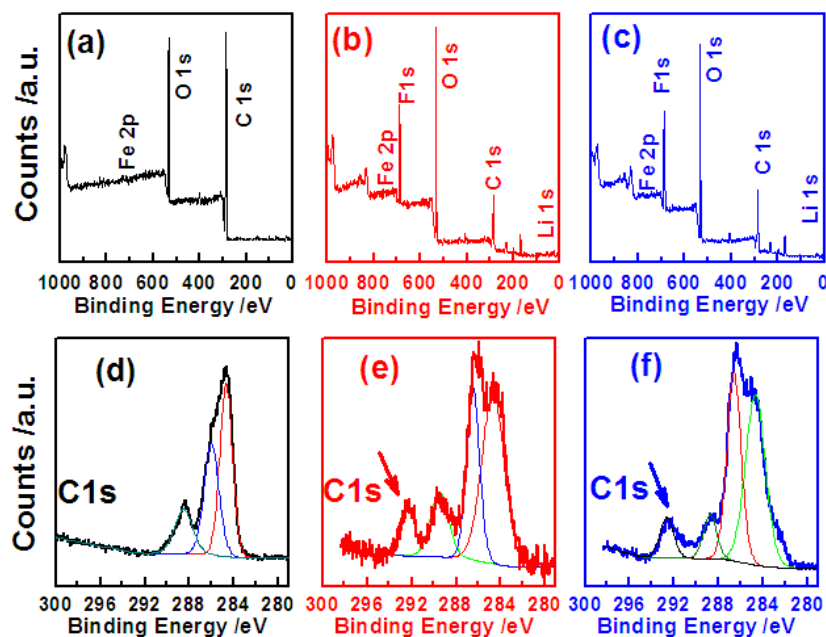

**Fig. S4.** XPS spectra for Fe/Fe<sub>3</sub>C-CNF cathodes marked black for fresh electrode, red for after discharge and blue for recharge: (a)~(c) full spectra; (d)~(f) C 1s.

As revealed in the Li 1s XPS spectra in Fig. 4(d), the main discharge product of Li<sub>2</sub>O<sub>2</sub> is generated, and after charge, the Li<sub>2</sub>O<sub>2</sub> is decomposed. When switched to the C 1s XPS spectra in Figs. S4(d~f), the signal for C1s at 292.2 eV for Li<sub>2</sub>CO<sub>3</sub> can be found in the discharged and recharged Fe/Fe<sub>3</sub>C-CNF cathodes.<sup>1-2</sup> In addition, most of them cannot be decomposed in the charged process.

## References

- 1 F. Li, D. M. Tang, Y. Chen, D. Golberg, H. Kitaura, T. Zhang, A. Yamada and H. Zhou, *Nano letters*, 2013, **13**, 4702.
- 2(a) M. M. Ottakam Thotiyl, S. A. Freunberger, Z. Peng and P. G. Bruce, *Journal of the American Chemical Society*, 2013, **135**, 494; (b) S. A. Freunberger, Y. Chen, N. E. Drewett, L. J. Hardwick, F. Bardé and P. G. Bruce, *Angewandte Chemie International Edition*, 2011, **50**, 8609; (c) Y. Zhang, H. Zhang, J. Li, M. Wang, H. Nie and F. Zhang, *Journal of Power Sources*, 2013, **240**, 390.
